# Supplementary material
Source: Springer Nature journal article supplement (https://www.springerprofessional.de/resource/supplementary/13638_2014_1022_MOESM11_ESM.pdf/11899068)

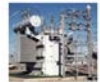

Comm. Failure

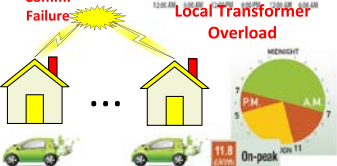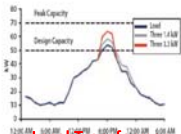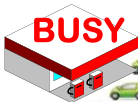

? -Location?  
-Price?  
Availability?

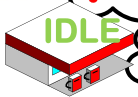

! -Inefficient use of resources  
Bad Customer service

Public Charging

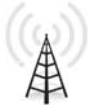

Comm. Failure

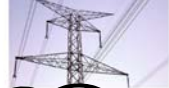

? Auction for Energy Trading  
-Bid -Amount  
Load Shifting

Comm. Failure

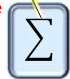

AGGREGATOR

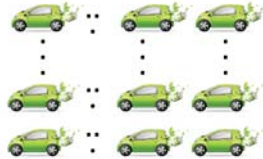

LOAD SHIFTING VIA V2G

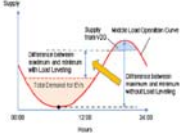

Supplement: MOESM11 [file 11899068]
